# Supplementary material for: Bone regenerative effect of recombinant human bone morphogenetic protein-2 after cyst enucleation
Source: Maxillofac Plast Reconstr Surg. 2016 May 26;38(1):22. doi: 10.1186/s40902-016-0070-4 (PMC4937077; doi:10.1186/s40902-016-0070-4)
Supplement: Additional file 1: — Case form and result of data. (XLSX 13 kb) [file 40902_2016_70_MOESM1_ESM.xlsx]

## Sheet: Sheet1
성명	부위	성별	나이	Dx	BMP	collagen	Pre	200	600	200	600				200	600
A	LR	M	16	Dentigerous	2	5	14816.1	3965.51	13155.8	0.732351	0.112056			최대	0.882087	0.55328
	LR	F	50	Dentigerous	1	1	1976.25	471.13	882.83	0.761604	0.55328			3분위	0.807912	0.350368
	LL	M	21	KCOT	2	3	6469.34	3429.24	5573.62	0.469924	0.138456			중간	0.746977	0.243436
	LR	M	45	Dentigerous	1	1	2269.98	267.66	1523.73	0.882087	0.328747			1분위	0.687604	0.143373
	LL	M	41	Dentigerous	1	3	3144.71	1029.3	2020.24	0.672688	0.357575			최하	0.469924	0.112056
	LL	M	20	Dentigerous	1	3	5018.23	886.48	4224.72	0.823348	0.158125	0.723667	0.274707
												14.3897	17.0881		200	600
B	LL	M	51	Dentigerous	x	2	2300.13	852.69	1932.56	0.629286	0.159804			최대	0.727765	0.324073
	UR	M	48	Periapical	x	2	6640.24	2636.94	6300.59	0.602885	0.0511503			3분위	0.622686	0.282413
	LR	M	37	Dentigerous	x	1	1237.44	867.65	1026.28	0.298835	0.170643			중간	0.60044	0.165223
	LL	M	37	Dentigerous	x	2	2665.51	1071.55	1801.69	0.597994	0.324073			1분위	0.48557	0.120415
	UR	M	45	Dentigerous	x	1	2949.89	1628.06	2633.41	0.448095	0.107285			최하	0.298835	0.0511503
	UL	M	40	Periapical	x	2	13482.5	3670.42	9172.57	0.727765	0.319669	0.55081	0.188771
												15.2612	11.1524
						A(mean)	5.61576	1.67489	4.56349	72.3667	27.4707			14.8161	2.30013
						B(mean)	4.87929	1.78788	3.81118	55.081	18.8771			1.97625	6.64024
						A(SD)	4.8224	1.59952	4.5655	14.3897	17.0881			6.46934	1.23744
						B(SD)	4.59685	1.14236	3.21409	15.2612	11.1524			2.26998	2.66551
										63.7238	23.1739			3.14471	2.94989
														5.01823	13.4825
